# Supplementary material
Source: Royal Society of Chemistry journal article supplement (doi:10.1039/d6nj01549b)
Supplement: d6nj01549b1.pdf [file d6nj01549b1.pdf]

## A smartphone-based dual-channel flame photometric platform and application in ratiometric determination of potassium ions

Jianzhi Dou,<sup>a</sup> Xiaoyi Bai,<sup>b</sup> Junying Ge,<sup>a</sup> Haiyan Song<sup>b</sup> and Dazhong Shen<sup>\* b</sup>

<sup>a</sup> College of Agriculture and Forestry Science and Technology, Weifang Engineering Vocational College, Weifang 262500, PR China

<sup>b</sup> College of Chemistry, Chemical Engineering and Materials Science, Key Laboratory of Molecular and Nano Probes, Ministry of Education, Shandong Normal University, Jinan 250014, P. R. China.

-----

\* Corresponding author. Email address: dzshen@sdnu.edu.cn (D. Shen)

## Contents

|                                                                                    |    |
|------------------------------------------------------------------------------------|----|
| Reagents and apparatus                                                             | S3 |
| Pictures of accessories in portable flame photometric platform                     | S4 |
| Schematic drawing for the measurement of the emission spectrum of flame            | S5 |
| Pictures of blank flame and the flame with the spray of KCl and CsCl.              | S5 |
| Brightness values of K and Cs channels at different detection areas of the flame   | S6 |
| Recovery for the determination of $K^+$ by the portable flame photometric platform | S7 |
| Determination of $K^+$ in actual samples                                           | S8 |

## Reagents and instrument

All the reagents were analytical pure and used directly without further purification. All aqueous solutions in the experiment were prepared with ultrapure water as solvent. Potassium chloride (KCl) and cesium chloride (CsCl) purchased from Sinopharm Chemical Reagent Co. Ltd. (Shanghai, China). The emission spectrum of the flame was measured using the Hitachi F-7000 fluorescence spectrometer with the transmission of a plastic optical fiber with the outside diameter of 10 mm. The reference method for  $K^+$  and  $Cs^+$  analysis is the commercial atomic absorption spectrometer PE-AA800 equipped with an air-acetylene flame.

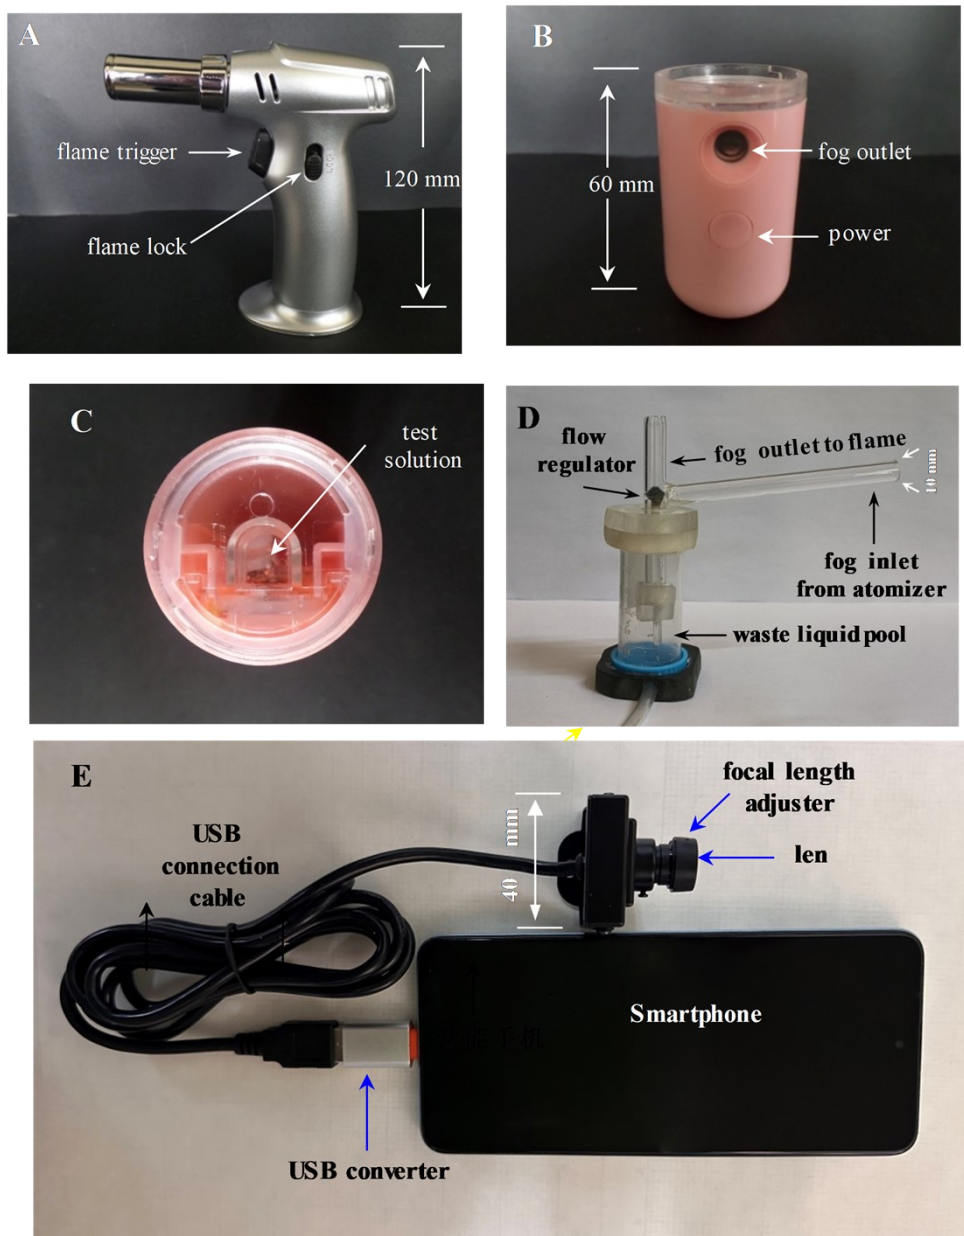

**Fig. S1** Pictures of a windproof lighter (A), cosmetic ultrasonic nebulizer (B,C), T-glass tube assembly for aerosol to flame (D), infrared camera controlled by smartphone (E).

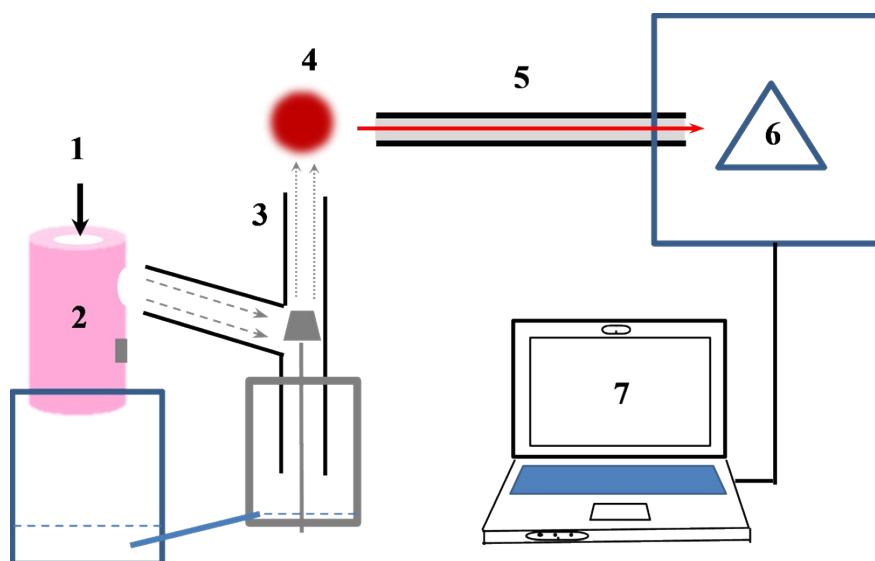

**Fig. S2** Schematic drawing for the measurement of the emission spectrum of the flame by a fluorospectrophotometer. (1) test solution, (2) cosmetic ultrasonic nebulizer (3), T-glass tube assembly for aerosol to flame, (4) flame for atomic emission, (5) optic fiber, (6) fluorospectrophotometer, (7) computer.

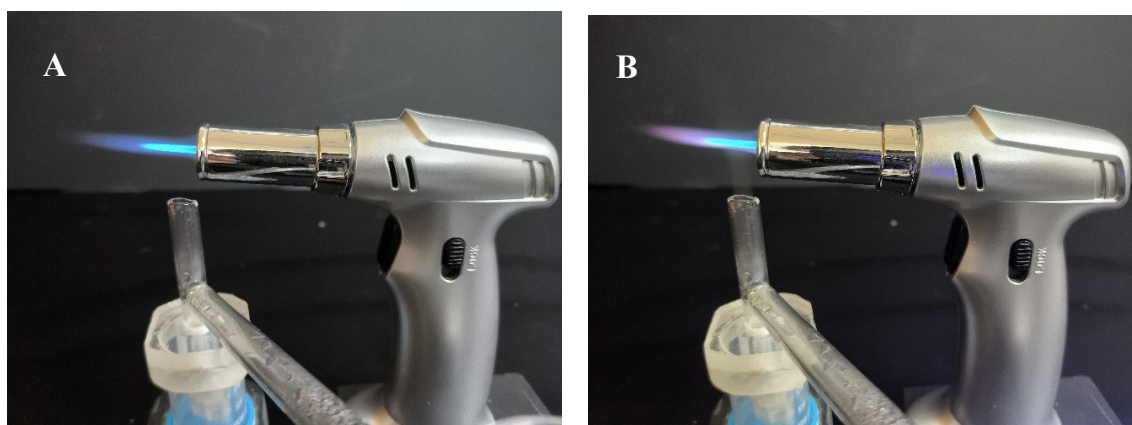

**Fig. S3** Pictures of blank flame (A) and the flame with the spray of the mixture of 5.0 mM KCl and 5.0 mM CsCl.

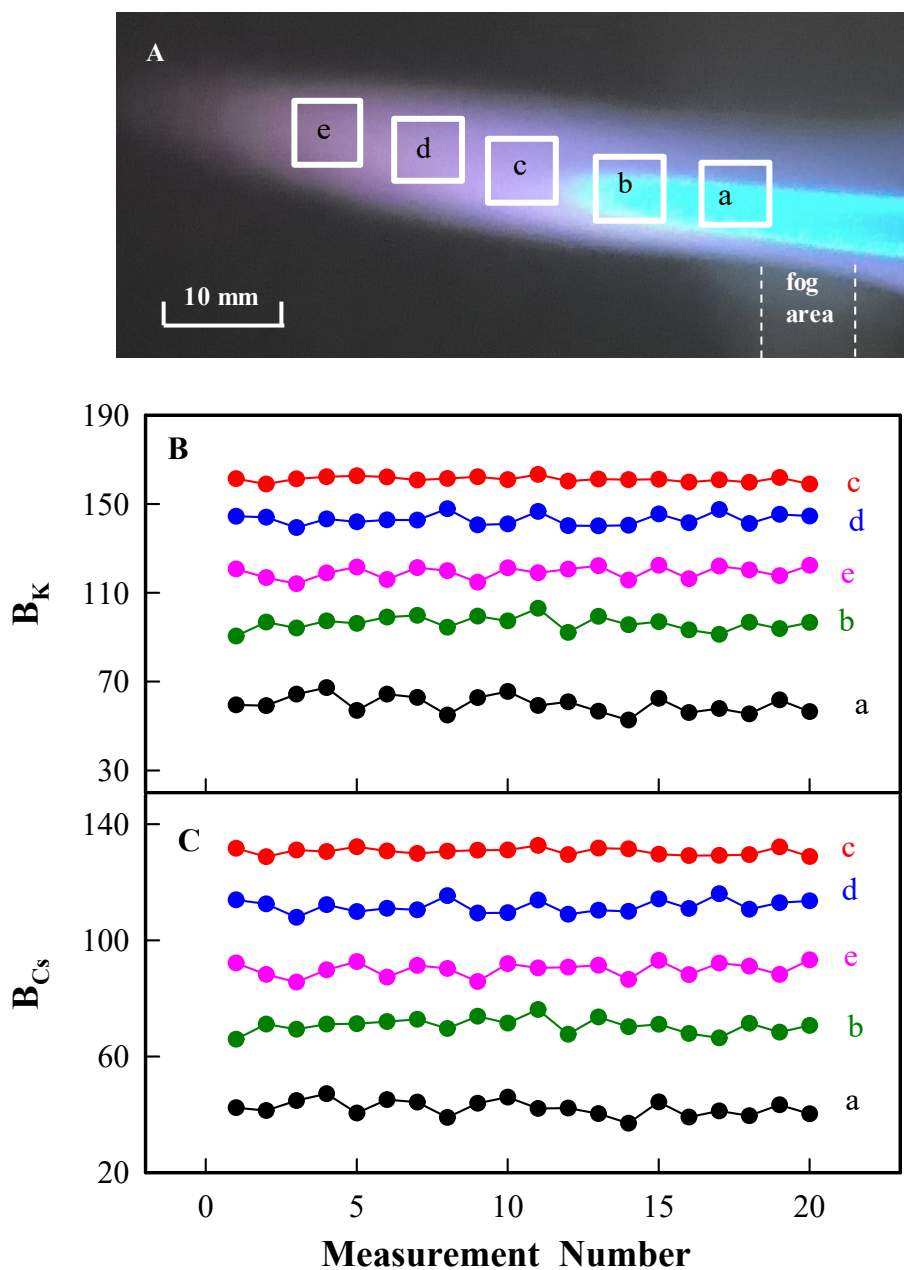

**Fig. S4** Sampling areas in the frame (A), brightness values of K (B) and Cs (C) channels at different detection areas (a→e) of the frame. Experimental conditions: EV= -10, 100  $\mu\text{M}$   $\text{K}^+$  and 100  $\mu\text{M}$   $\text{Cs}^+$ .

**Table S1.** Recovery for the determination of K<sup>+</sup> by the portable flame photometric device in ratiometric mode (n=3).

| Solutions                                            | Detected<br>(mM) | Recovery<br>(%) |
|------------------------------------------------------|------------------|-----------------|
| 100.0 μM KCl                                         | 99.5 ± 2.3       | 99.5            |
| 100.0 μM KCl + 10 mM NaCl                            | 103.1 ± 3.4      | 103.1           |
| 100.0 μM KCl + 10 mM NaNO <sub>3</sub>               | 95.4 ± 3.9       | 95.4            |
| 100.0 μM KCl + 10 mM NaNO <sub>2</sub>               | 101.3 ± 3.6      | 101.3           |
| 100.0 μM KCl + 10 mM Na <sub>2</sub> SO <sub>4</sub> | 97.6 ± 3.6       | 97.6            |
| 100.0 μM KCl + 10 mM Na <sub>2</sub> CO <sub>3</sub> | 102.8 ± 4.3      | 102.8           |
| 100.0 μM KCl + 10 mM Na <sub>3</sub> PO <sub>4</sub> | 95.7 ± 4.5       | 95.7            |
| 100.0 μM KCl + 10 mM Na <sub>2</sub> SO <sub>4</sub> | 103.5 ± 3.4      | 103.5           |
| 100.0 μM KCl + 10 mM LiCl                            | 99.1 ± 3.1       | 99.1            |
| 100.0 μM KCl + 10 mM RbCl                            | 104.9 ± 3.5      | 104.9           |
| 100.0 μM KCl + 10 mM NH <sub>4</sub> Cl              | 98.2 ± 2.5       | 98.2            |
| 100.0 μM KCl + 10 mM CaCl <sub>2</sub>               | 102.1 ± 3.9      | 102.1           |
| 100.0 μM KCl + 10 mM MgCl <sub>2</sub>               | 97.8 ± 3.3       | 97.8            |
| 100.0 μM KCl + 10 mM BaCl <sub>2</sub>               | 103.8 ± 4.1      | 103.8           |
| 100.0 μM KCl + 10 mM SrCl <sub>2</sub>               | 104.3 ± 3.8      | 104.3           |
| 100.0 μM KCl + 10 mM CuCl <sub>2</sub>               | 97.8 ± 3.5       | 97.8            |
| 100.0 μM KCl + 10 mM ZnCl <sub>2</sub>               | 95.1 ± 3.4       | 95.1            |
| 100.0 μM KCl + 10 mM MnCl <sub>2</sub>               | 102.8 ± 3.3      | 102.8           |
| 100.0 μM KCl + 10 mM FeCl <sub>3</sub>               | 96.3 ± 4.3       | 96.3            |
| 100.0 μM KCl + 10 mM AlCl <sub>3</sub>               | 101.7 ± 4.5      | 101.7           |

**Table S2.** Determination of K<sup>+</sup> in actual samples by the portable flame photometric device and AAS method (n=3).

| Samples           | Proposed method<br>(mM) | AAS<br>(mM)  | Relative error<br>(%) |
|-------------------|-------------------------|--------------|-----------------------|
| Tap water         | 0.249 ± 0.05            | 0.239 ± 0.02 | 4.2                   |
| River water No.1  | 0.351 ± 0.07            | 0.363 ± 0.03 | -3.3                  |
| River water No.2  | 0.289 ± 0.06            | 0.276 ± 0.02 | 4.7                   |
| River water No.3  | 0.189 ± 0.05            | 0.198 ± 0.02 | -4.5                  |
| Human urine No.1  | 17.8 ± 0.5              | 17.2 ± 0.2   | 3.5                   |
| Human urine No.2  | 13.2 ± 0.4              | 13.9 ± 0.2   | -5.0                  |
| Human urine No.3  | 10.8 ± 0.3              | 10.4 ± 0.2   | 3.8                   |
| Orange juice No.1 | 52.9 ± 1.2              | 50.6 ± 0.4   | 4.5                   |
| Orange juice No.2 | 45.4 ± 1.1              | 47.9 ± 0.4   | -5.2                  |
| Orange juice No.3 | 41.7 ± 1.0              | 40.2 ± 0.3   | 3.7                   |

**Table S3.** Determination of dissolvable potassium in compound fertilizer samples by the portable flame photometric device and AAS method (n=3).

| Samples           | Proposed method<br>(% w/w) | AAS<br>(% w/w) | Relative error<br>(%) |
|-------------------|----------------------------|----------------|-----------------------|
| High potassium    | 23.2 ± 0.4                 | 23.9 ± 0.2     | -2.9                  |
| Universal ternary | 11.3 ± 0.2                 | 11.8 ± 0.1     | 4.2                   |
| Special ternary   | 14.6 ± 0.3                 | 14.3 ± 0.1     | -3.6                  |
